# Supplementary material for: In Vitro Effects of Low Doses of β-Caryophyllene, Ascorbic Acid and d-Glucosamine on Human Chondrocyte Viability and Inflammation
Source: MDPI journal article supplement (doi:10.3390/ph14030286), 2021-03-23
Supplement: s1 [file s1]

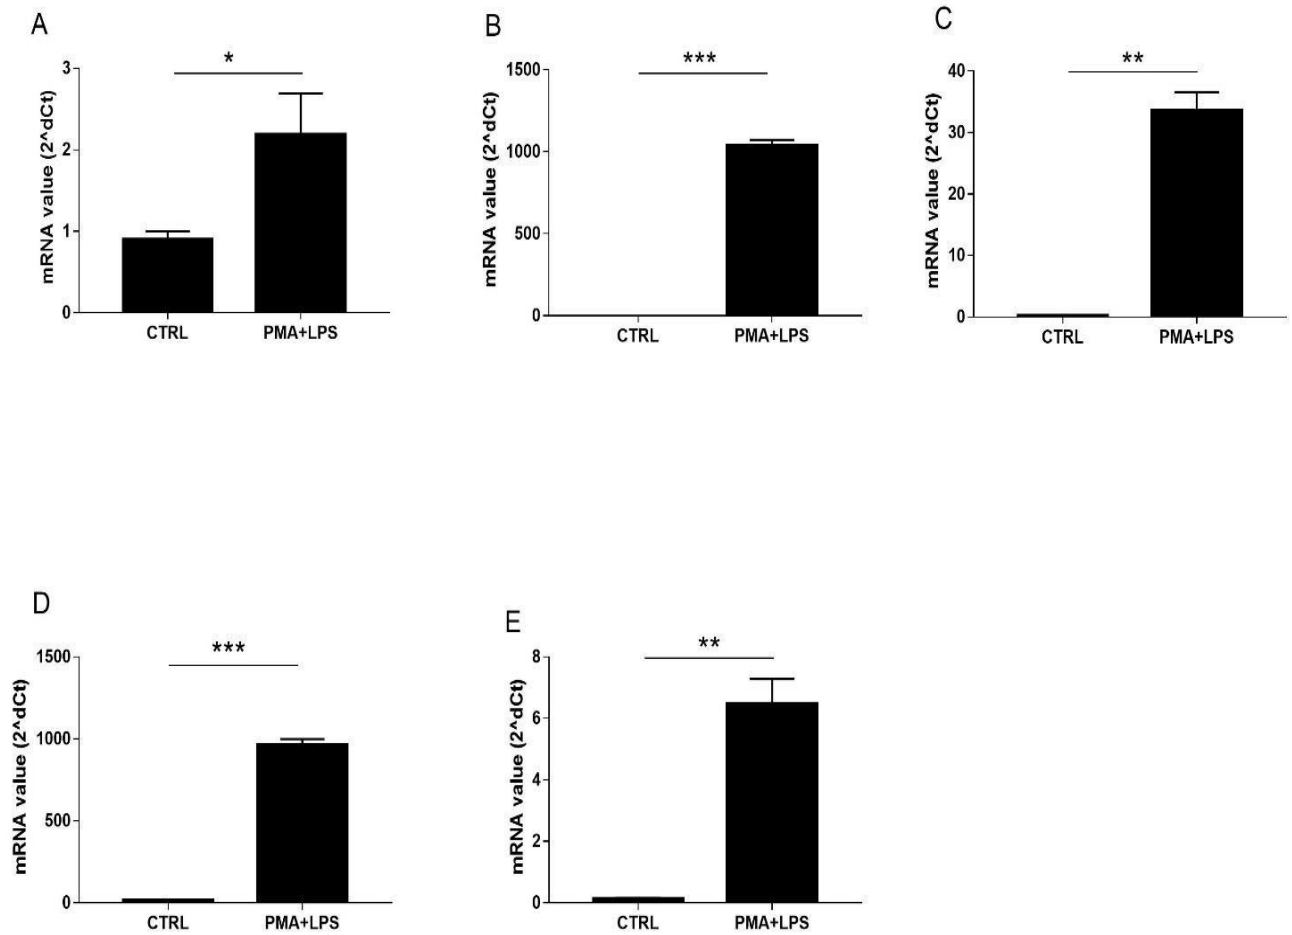

**S1. The conditioned medium (CM) of activated U937 cells induced pro-inflammatory molecules.** Detection of pro-inflammatory molecules in U937 cells exposed for 24h to PMA and LPS and then cultured under optimal conditions. RNA transcript levels specific for A), *IL-6*, B) *IL-1β*, C) *TNF-α*, D) *Gal-1* and E) *Gal-3* were evaluated by qPCR. Data are expressed as mean ± SE obtained from three independent experiments. Statistical differences based on unpaired Student's t-test. \*P<0.05, \*\*P<0.01 and \*\*\*P<0.001 vs untreated cells.

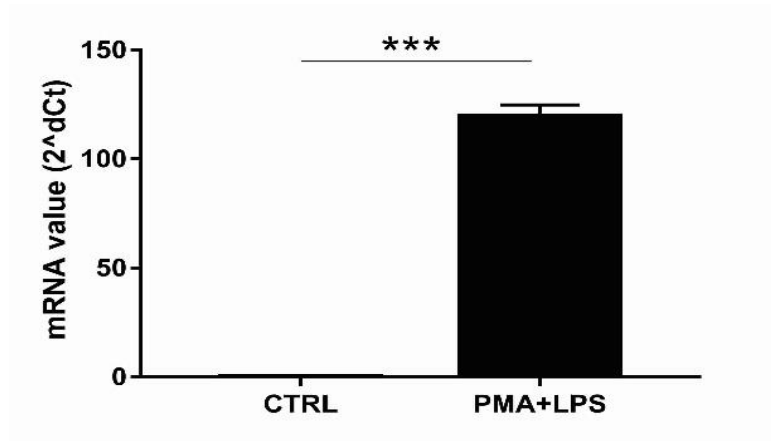

**S2. CD68 expression of activated U937 human monocytes.** Cells were exposed for 24 h to CM of activated U937 cells and then the mRNA expression was evaluated by qPCR analysis. Data are expressed as mean  $\pm$  standard error (SE) of 3 independent experiments. Statistical differences based on unpaired Student's t-test, \*\*\*P<0.001 vs untreated cells.

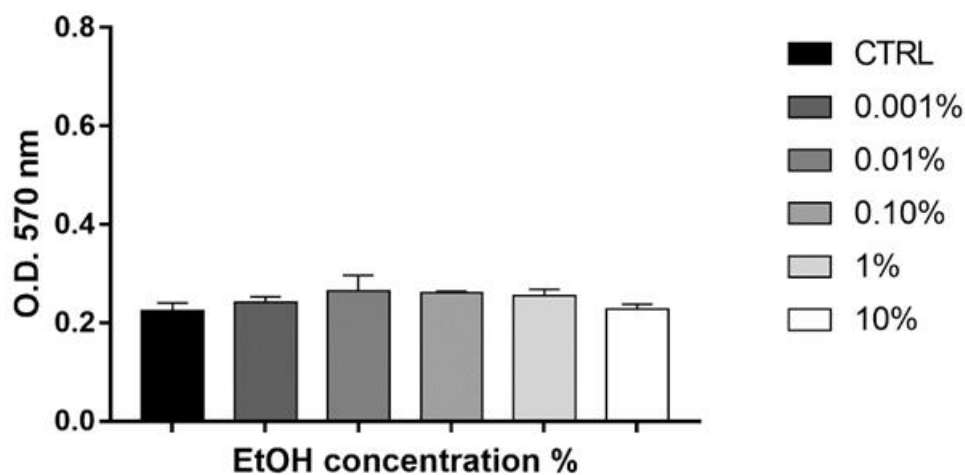

**S3. The effect of ethanol concentration on human chondrocyte viability.** Cells were seeded in 96-well culture dishes and exposed to ethanol (EtOH). The MTT test was performed 48 h after treatment. Data are reported as mean  $\pm$  SE of three independent experiments. Statistical differences are based on ANOVA test with multiple comparison.
